# Supplementary material for: Discovery of Myeloid-Derived Suppressor Cell-Specific Metabolism by Metabolomic and Lipidomic Profiling
Source: MDPI journal article supplement (doi:10.3390/metabo13040477), 2023-03-27
Supplement: s1 [file s1]

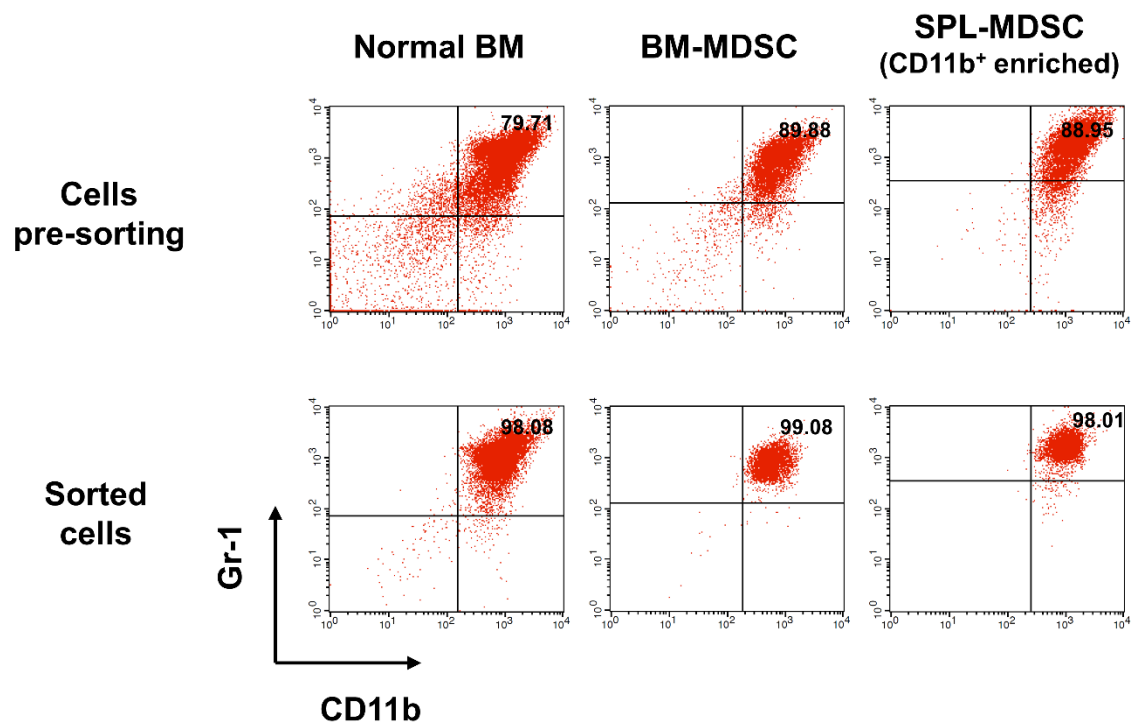

**Figure S1.** Purity of sorted cells. CD11b<sup>+</sup>GR-1<sup>+</sup> cells from bone marrow and spleen were sorted using a cytometer. Prior to sorting, CD11b<sup>+</sup> splenocyte were positively selected using magnetic beads.

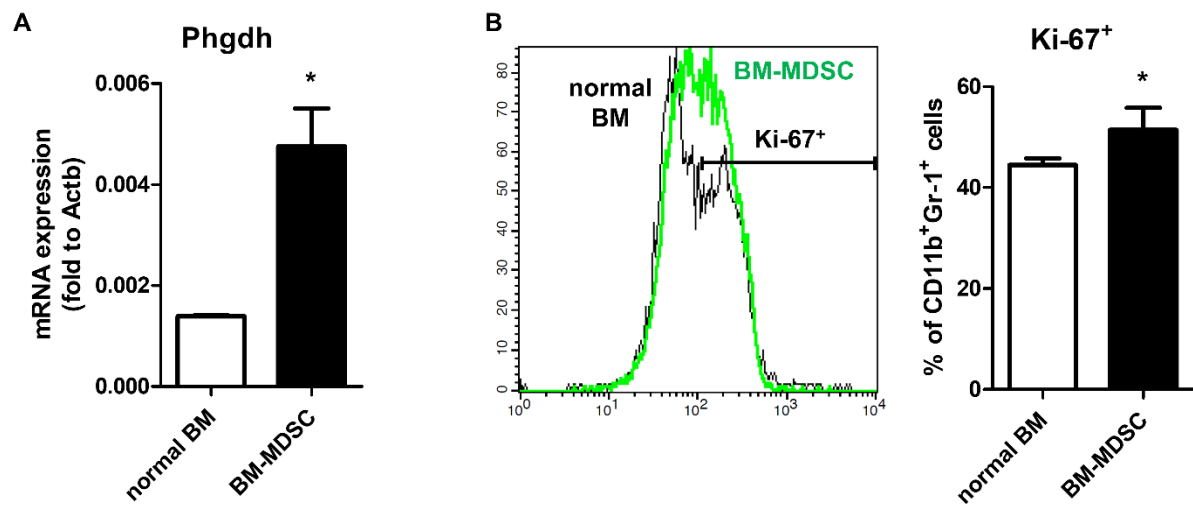

**Figure S2.** mRNA and protein expression level related to SGOC pathway. Normal BM and BM-MDSC were harvested from normal and tumor-engrafted mice. (A) The *Phgdh* mRNA expression levels were measured by qRT-PCR and normalized by *Actb*. (B) Ki-67 expression levels of CD11b<sup>+</sup>Gr-1<sup>+</sup> cells were measured by flow cytometer. Data shown are expressed as mean  $\pm$  SEM of three replicates with similar results. \*,  $p < 0.05$ . The  $p$  values were obtained by Student's  $t$ -test.
